# Supplementary material for: EBV-encoded RNA via TLR3 induces inflammation in nasopharyngeal carcinoma
Source: PubMed Central journal article supplement (PMC4695186; doi:10.18632/oncotarget.4552), 2015-07-04
Supplement: oncotarget-06-24291-s001.pdf [file oncotarget-06-24291-s001.pdf]

SUPPLEMENTARY FIGURES AND TABLES

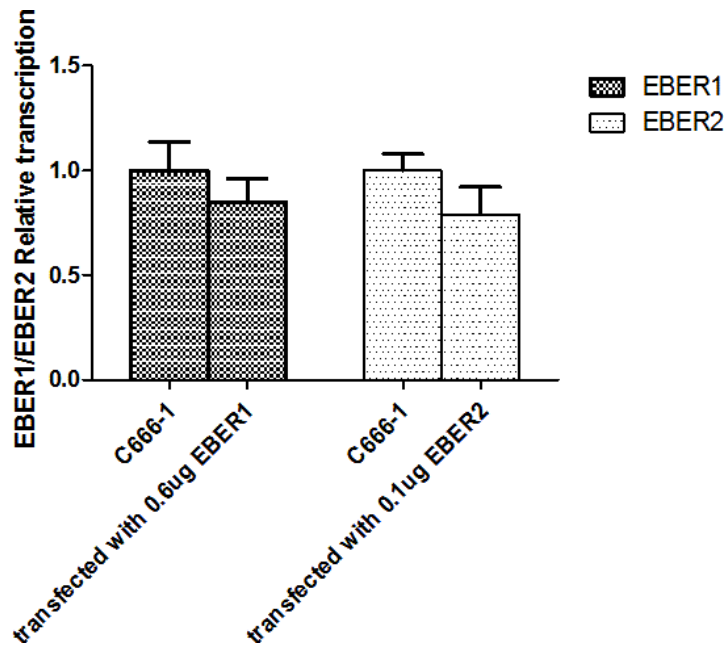

Supplementary Figure S1: Validation of comparable EBER1 and EBER2 levels between the HNE2 cells challenged with *in vitro* transcribed EBER1 or EBER2 and C666-1 cells.

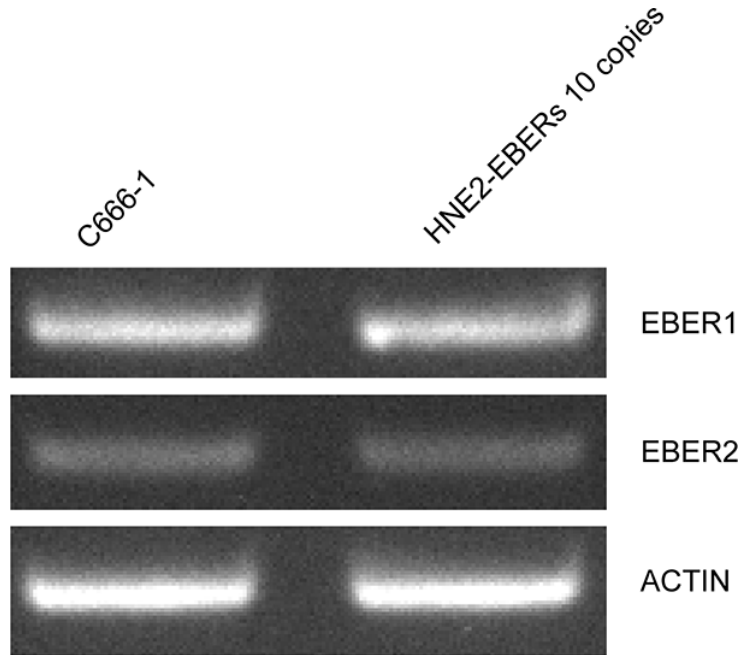

**Supplementary Figure S2: Identification of EBER1 and EBER2 transcription level in HNE2 cells expressing 10 copies of EBERs construct relative to C666-1 cells.**

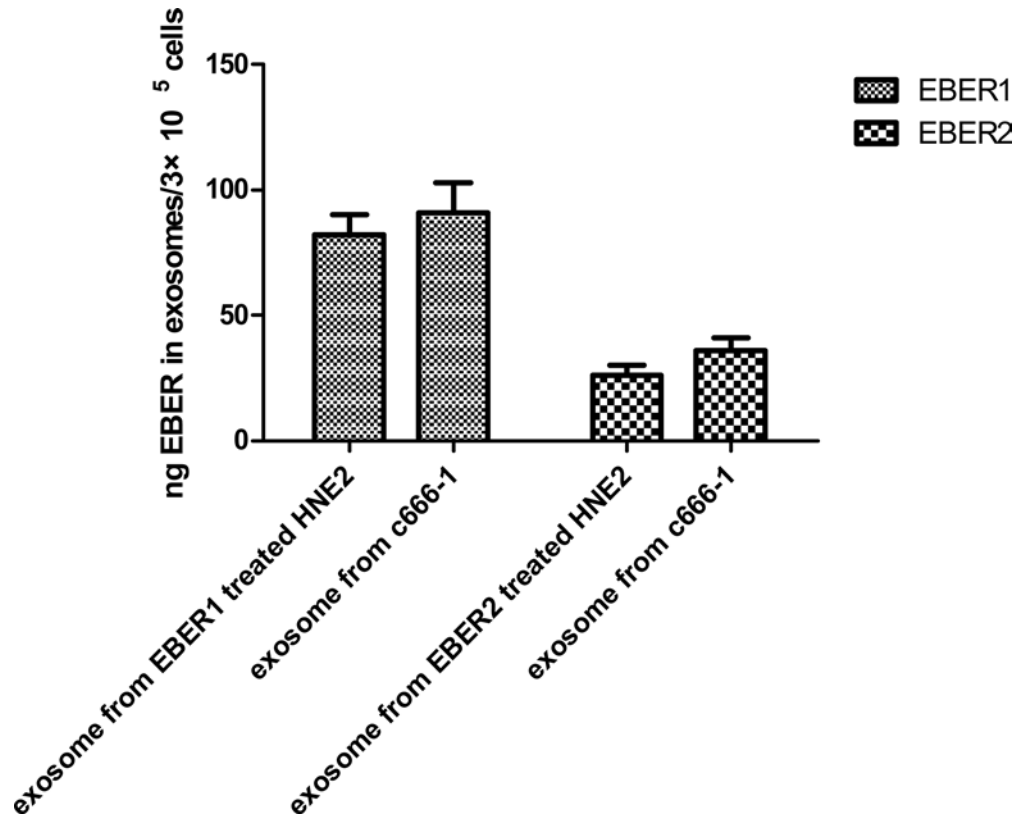

Supplementary Figure S3: Comparison of the amount of EBER1 and EBER2 in isolated exosomes from C666-1 and *in vitro* transcribed EBERs treated HNE2 cells.

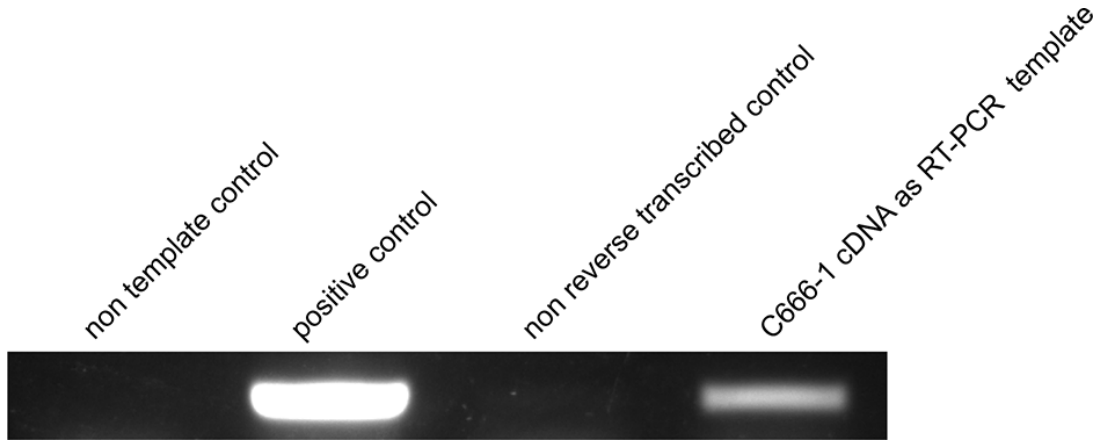

**Supplementary Figure S4: EBER1 and EBER2 may coexist as a transcript.** Possible existence of a transcript encompassing both EBER1 and EBER2 was identified by RT-PCR with EBER1 forward primer and EBER2 reverse primer. Positive control: EBERS expression plasmid as PCR template; Non reverse transcribed control: C666-1 RNA treated with DNase I as PCR template.

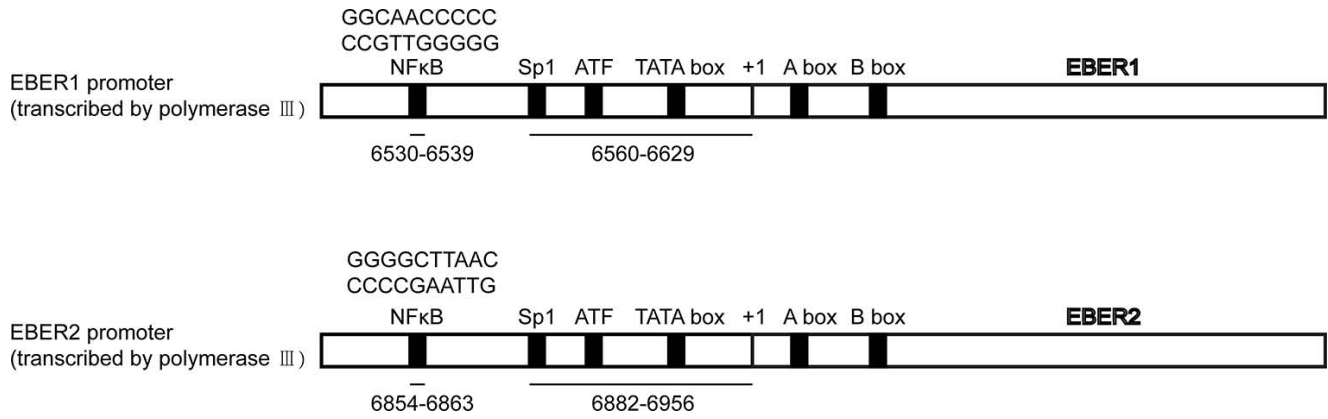

**Supplementary Figure S5: Graphic representation displays EBERs transcripts and location of EBERs transcription factor.**

**Supplementary Table S1. Primer sequences**

| Gene         | Forward                         | Reverse                        |
|--------------|---------------------------------|--------------------------------|
| EBER1        | 5'-AGGACCTACGCTGCCCTAGA-3'      | 5'-AAAACATGCGGACCACCAGC-3'     |
| EBER2        | 5'-AGGACAGCCGTTGCCCTAGTG-3'     | 5'-AAAATAGCGGACAAGCCGAATAC-3'  |
| EBER1 (CHIP) | 5'- TGTA AACACCGACCGC -3'       | 5'- AAGACAGACTACGTCACCGT-3'    |
| EBER2 (CHIP) | 5'-TATCCCGCAGTTCCAC-3'          | 5'-TGATGTAGCGAACCGTAA-3'       |
| M-CSF        | 5'-TAGCCACATGATTGGGAGTG-3'      | 5'-TATCTCTGAAGCGCATGGTG-3'     |
| MCP-1        | 5'-GCTGTGATCTTCAAGACCATTGTG-3'  | 5'-TGGAATCCTGAACCCACTTCTG-3'   |
| IL-6         | 5'-GGTACATCCTCGACGGCATCT-3'     | 5'-GTGCCTCTTTGCTGCTTTCAC-3'    |
| TNF $\alpha$ | 5'-CCCAGGCAGTCAGATCATCTTC-3'    | 5'-AGCTGCCCCTCAGCTTGA-3'       |
| IL1 $\alpha$ | 5'-CGCCAATGACTCAGAGGAAGA.-3'    | 5'- AGGGCGTCATT CAGGATGAA-3'   |
| TLR3         | 5'-CCTGGTTTGTAAATTGGATTAACGA-3' | 5'-TGAGGTGGAGTGTTGCAAAGG-3'    |
| IFN $\beta$  | 5'-CAGCAATTTTCAGTGTCAGAAGC-3'   | 5'-TCATCCTGTCCTTGAGGCAGT-3'    |
| LMP1         | 5'-AGCGACTCTGCTGGAAATGAT-3'     | 5'-TGATTAGCTAAGGCATTCCCA-3'    |
| CCL1         | 5'-ACAGAAAGGCCCTCAACTGTC-3'     | 5'-TCCTTGATGTACTCTTGGACCC-3'   |
| CCL17        | 5'-AGAGCCACAGTGAGGGAGAT-3'      | 5'-TTAATCTGGGCCCTTTGTGC-3'     |
| CXCL13       | 5'-GCTTGAGGTGTAGATGTGTCC-3'     | 5'-CCCACGGGGCAAGATTTGAA-3'     |
| CXCL8        | 5'-GAATGGGTTTGCTAGAATGTGATA-3'  | 5'-CAGACTAGGGTTGCCAGATTTAAC-3' |
| ACTIN        | 5'-CTGGAACGGTGAAGGTGACA-3'      | 5'-AAGGGACTTCCTGTAACAATGCA-3'  |

**Supplementary Table S2. Targeting sequences for shRNA**

| Gene  | Targeting sequences                                                                               |
|-------|---------------------------------------------------------------------------------------------------|
| EBER1 | #1: 5'-CGGTGTCTGTGGTTGTCTT-3'; #2: 5'-CTCTGCTTTCTGCCGTCTT-3'                                      |
| EBER2 | #1: 5'-GCATTTGCAAGTCAGGATT-3'; #2: 5'-GGATTCTCTAATCCCTCTG-3'                                      |
| TLR3  | 1#: 5'-AAGTGCACTGTTAGCCATGAA-3', 2#: 5'-CCTTACACATACTCAACCTAA-3'; 3#: 5'-CCTCTTCGTAACCTGACCATT-3' |
